# Supplementary material for: Bacteriophages against Serratia as Fish Spoilage Control Technology
Source: PubMed Central journal article supplement (PMC5378772; doi:10.3389/fmicb.2017.00449), 2017-04-04

## *Supplementary Material*

### **Bacteriophages against *Serratia* as Fish Spoilage Control Technology**

Igor Hernández\*

E- mail address: [ihernandez@azti.es](mailto:ihernandez@azti.es)

**Supplementary Table 1. Maximal bacteriophage titration (Log pfu/ml) after a single cultivation round (SFO009 as target strain)**

| Phage | Max titration |
|-------|---------------|
| AZT1  | 9.3           |
| AZT2  | 8.7           |
| AZT3  | 8.8           |
| AZT4  | 7.3           |
| AZT5  | 7.8           |
| AZT6  | 8.2           |
| AZT7  | 7.0           |
| AZT8  | 7.5           |
| AZT9  | 6.9           |
| AZT10 | 7.1           |

**Supplementary Table 2. Bacteriophage titration reduction (log cfu/ml) after storage at -80 °C (7 days) or 4 °C (30 days).**

| Phage | Reduction |      |
|-------|-----------|------|
|       | -80 °C    | 4°C  |
| AZT1  | -1.8      | -1.7 |
| AZT2  | -5.2      | -4.8 |
| AZT3  | -1.3      | -1.3 |
| AZT4  | -1.4      | -1   |
| AZT5  | -0.9      | -1.3 |
| AZT6  | -0.6      | -0.9 |
| AZT7  | -1.4      | -1.2 |
| AZT8  | -5.3      | -4.7 |
| AZT9  | -1.8      | -2.0 |
| AZT10 | -1.9      | -1.7 |

**Supplementary Figure 1. Bacteria growth (SFO009) in presence of bacteriophage (blue line, in all cases MOI was 1:1) or bacteriophage + 10mM Ca<sup>+2</sup> (red line). AZT1 (A), AZT2 (B), AZT3 (C), AZT4 (D), AZT5 (E), AZT6 (F), AZT7 (G), AZT8 (H), AZT9 (I) AZT10 (J) and control without bacteriophage (K).**

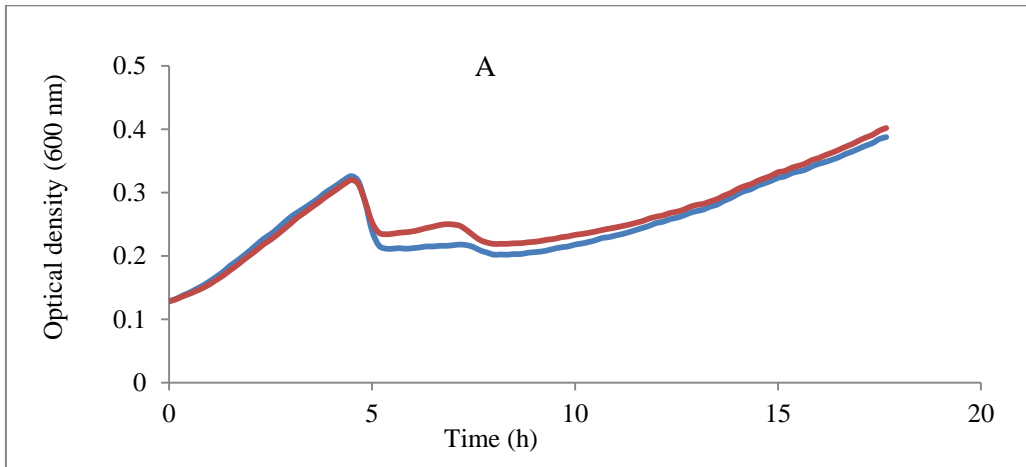

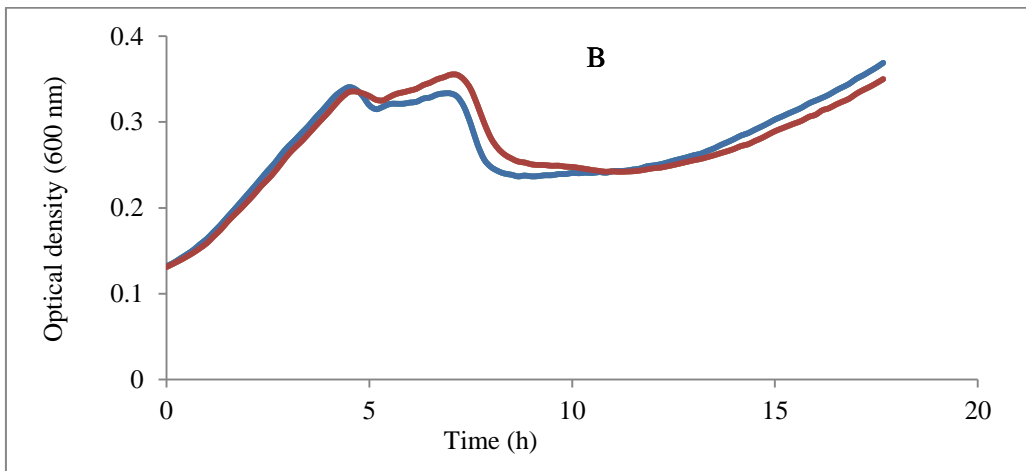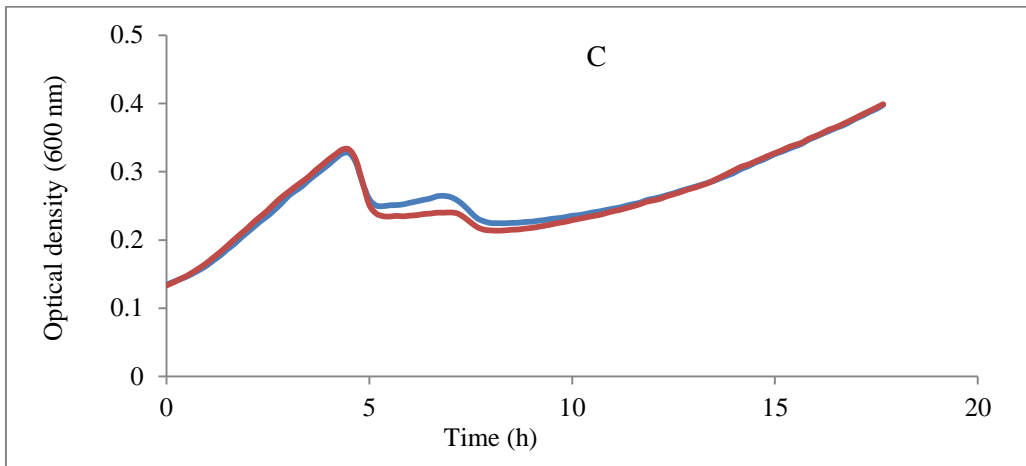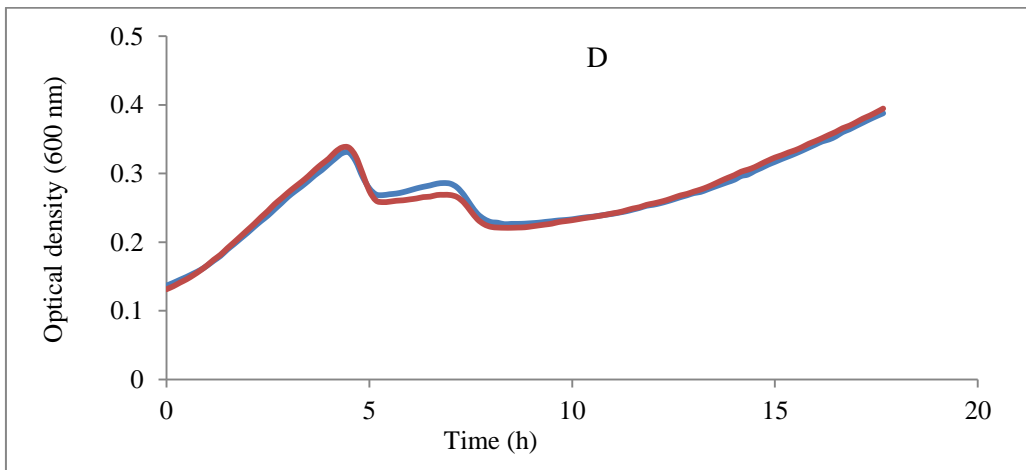

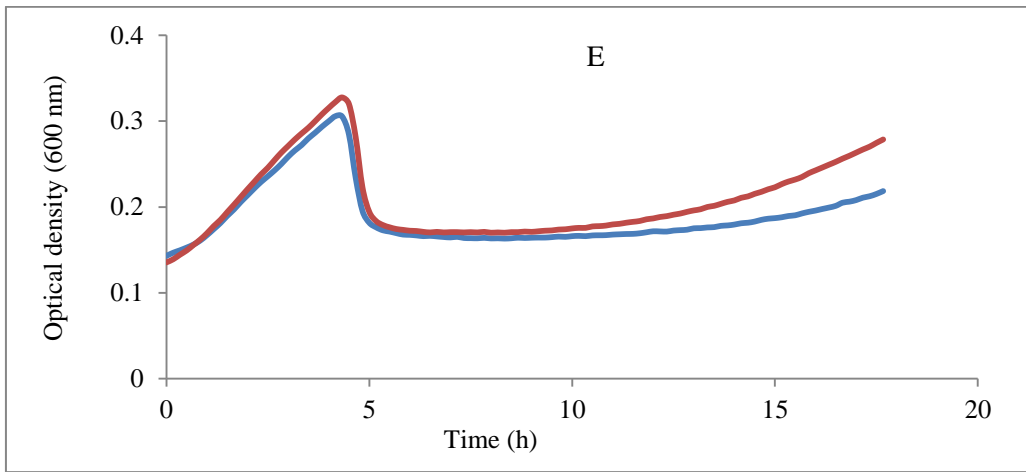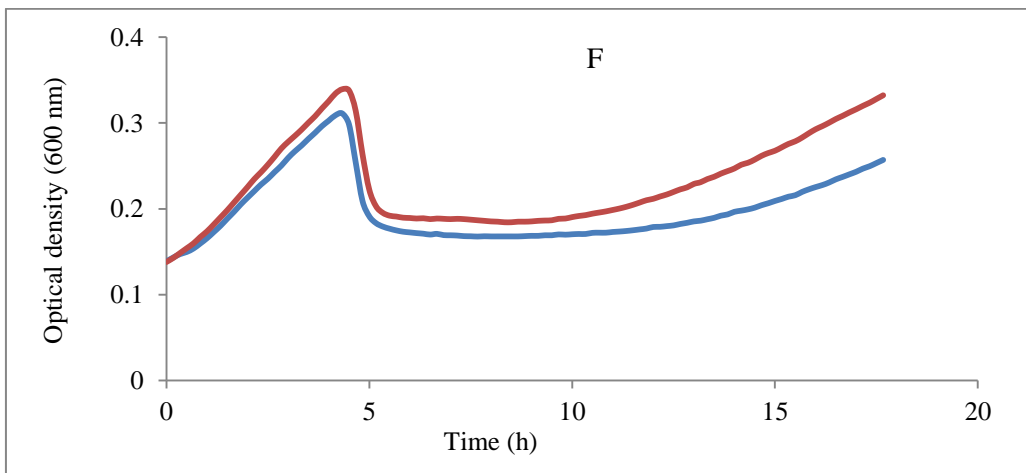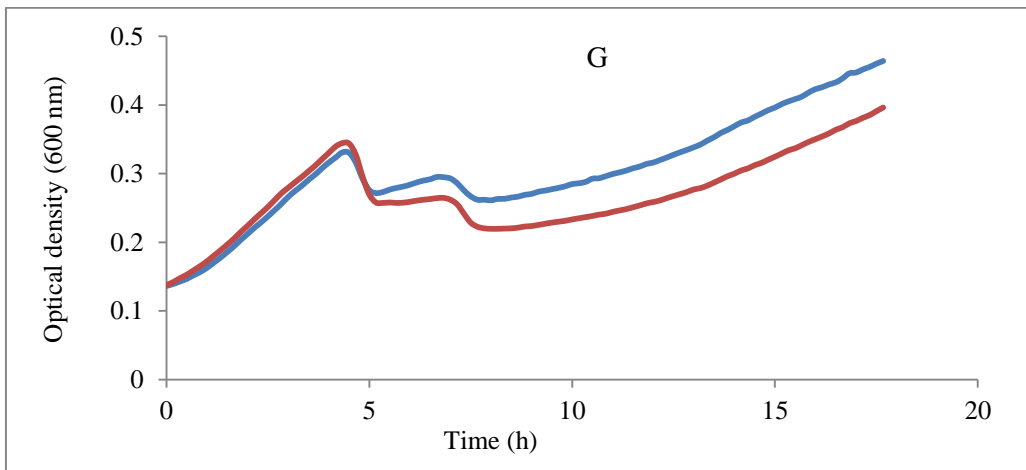

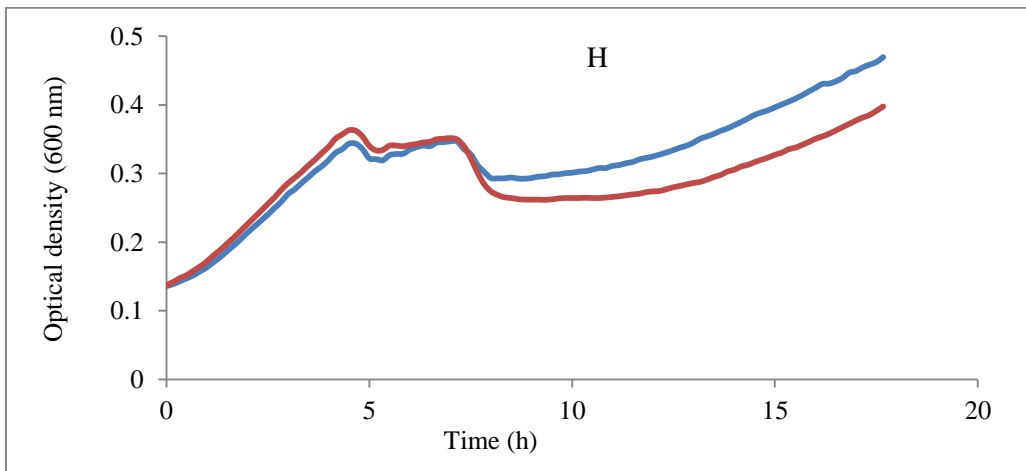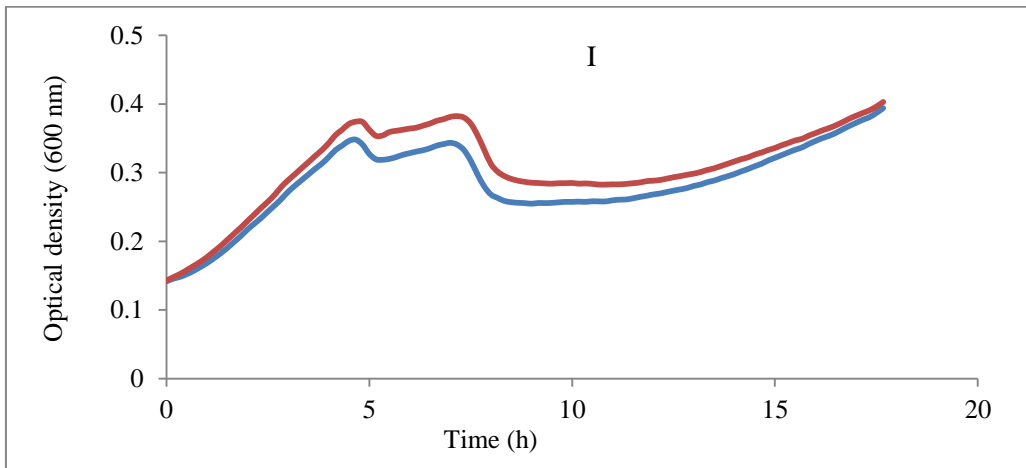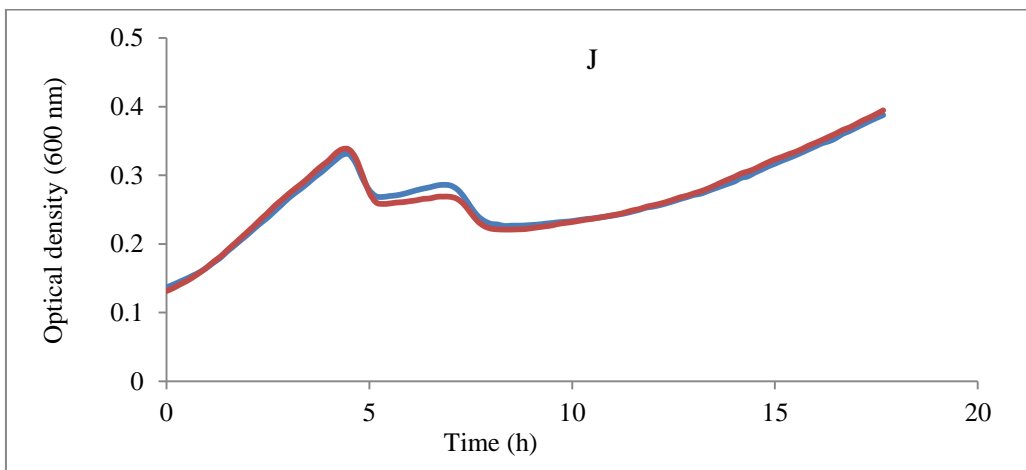

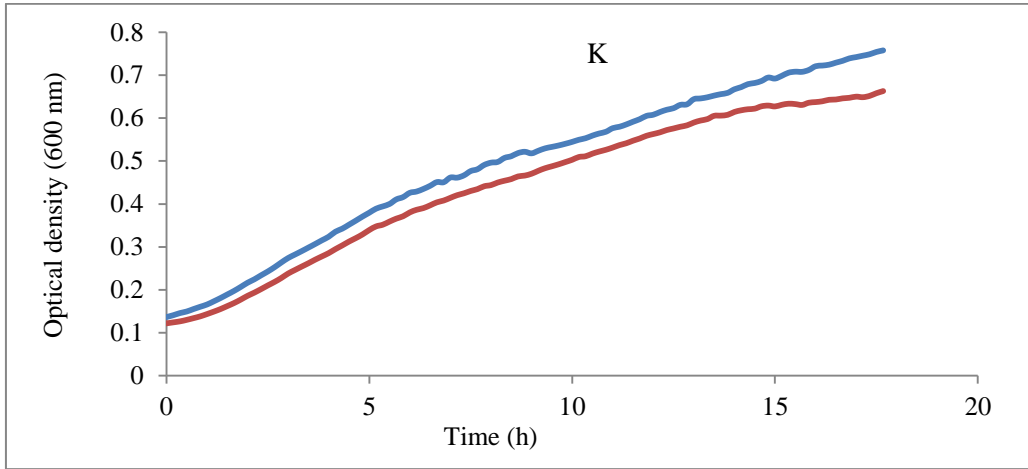

Supplement: Data_Sheet_1.pdf [file Data_Sheet_1.pdf]
